# Supplementary material
Source: Research Square preprint supplement (doi:10.21203/rs.3.rs-10368741/v1)
Supplement: Supplementary file 1 [file 5367c42a023c16bc6d27f8c2.docx]

**Additional file 1**

**Supplementary Tables**

**Manuscript:** Ferritin-to-Platelet Ratio Predicts Dengue Shock and Ferritin/ALT Ratio Discriminates Severe Hepatitis: Novel Composite Indices from a Prospective Serial Biomarker Study

**Description.** This Additional file provides the extended bivariate, diagnostic accuracy, and advanced statistical analyses supporting the main manuscript. Tables are numbered S1–S3 and referenced throughout the main text by section letter.

**Table S1** Bivariate comparisons — complete categorical and continuous analyses

**Section A — Categorical predictors vs severity and odds ratios**

| **Predictor** | **Test** | **p-value** | **OR** | **95% CI** |
| --- | --- | --- | --- | --- |
| **Age group** | Fisher | 0.689 | — | — |
| **Sex (Male)** | Chi-square | 0.517 | 1.50 | 0.55–4.32 |
| **Fever duration group** | Fisher | 0.974 | — | — |
| **Ferritin Day 1 band** | Fisher | <0.001 | — | — |
| **Ferritin Day 3 band** | Fisher | 0.001 | — | — |
| **Ferritin Day 5 band** | Fisher | <0.001 | — | — |
| **Thrombocytopenia PLT<100k** | Chi-square | <0.001 | ∞ | 7.07–∞ |
| **Severe thrombocytopenia PLT<20k** | Chi-square | <0.001 | 8.33 | 2.85–26.09 |
| **Severe hepatitis (AST/ALT ≥1,000)** | Chi-square | 0.154 | 2.46 | 0.73–8.04 |
| **Severe bleeding** | Chi-square | 0.032 | 3.07 | 1.07–8.86 |
| **Shock / DSS** | Chi-square | <0.001 | 19.75 | 5.63–83.30 |
| **Organ involvement** | Chi-square | <0.001 | 8.23 | 2.47–36.00 |

**Section B — Continuous variables by sex (Mann–Whitney U)**

| **Variable** | **Male Median** | **Female Median** | **p-value** | **Cohen's d** |
| --- | --- | --- | --- | --- |
| **Age (years)** | 26 | 25 | 0.918 | 0.06 |
| **Fever duration (days)** | 4 | 5 | 0.379 | 0.00 |
| **Haemoglobin (g/dl)** | 13.6 | 12.0 | 0.056 | 0.37 |
| **TLC (×10³/μL)** | 5.5 | 4.3 | 0.169 | 0.29 |
| **Platelet (/μL)** | 41,000 | 110,000 | 0.001 | −0.61 |
| **Haematocrit (%)** | 42.0 | 38.0 | <0.001 | 0.80 |
| **AST (IU/L)** | 130 | 141 | 0.888 | −0.06 |
| **ALT (IU/L)** | 106 | 101 | 0.902 | −0.04 |
| **Ferritin Day 1 (ng/ml)** | 750 | 600 | 0.187 | 0.26 |
| **Ferritin Day 3 (ng/ml)** | 950 | 950 | 0.526 | 0.13 |
| **Ferritin Day 5 (ng/ml)** | 850 | 800 | 0.157 | 0.35 |

**Section C — Continuous variables by age group (Kruskal–Wallis, 5 groups)**

| **Variable** | **Chi-square** | **df** | **p-value** |
| --- | --- | --- | --- |
| **Fever duration (days)** | 3.60 | 4 | 0.463 |
| **Haemoglobin (g/dl)** | 5.07 | 4 | 0.280 |
| **TLC (×10³/μL)** | 3.09 | 4 | 0.542 |
| **Platelet (/μL)** | 4.81 | 4 | 0.308 |
| **Haematocrit (%)** | 2.28 | 4 | 0.685 |
| **AST (IU/L)** | 1.06 | 4 | 0.900 |
| **ALT (IU/L)** | 5.54 | 4 | 0.236 |
| **Ferritin Day 1** | 4.46 | 4 | 0.347 |
| **Ferritin Day 3** | 5.73 | 4 | 0.220 |
| **Ferritin Day 5** | 6.31 | 4 | 0.177 |

**Section D — Continuous variables by fever duration group (Kruskal–Wallis, 4 groups)**

| **Variable** | **Chi-square** | **df** | **p-value** |
| --- | --- | --- | --- |
| **Haemoglobin (g/dl)** | 1.78 | 3 | 0.620 |
| **TLC (×10³/μL)** | 11.20 | 3 | 0.011 |
| **Platelet (/μL)** | 5.11 | 3 | 0.164 |
| **Haematocrit (%)** | 5.76 | 3 | 0.124 |
| **AST (IU/L)** | 2.62 | 3 | 0.453 |
| **ALT (IU/L)** | 2.48 | 3 | 0.479 |
| **Ferritin Day 1** | 1.56 | 3 | 0.669 |
| **Ferritin Day 3** | 0.73 | 3 | 0.867 |
| **Ferritin Day 5** | 1.52 | 3 | 0.676 |

**Section E — Categorical predictors by sex**

| **Predictor** | **p-value** |
| --- | --- |
| **Severity (WHO 2009)** | 0.517 |
| **Age group** | 0.681 |
| **Fever duration group** | 0.557 |
| **Ferritin Day 1 band** | 0.241 |
| **Ferritin Day 3 band** | 0.104 |
| **Ferritin Day 5 band** | 0.344 |

**Section F — Jonckheere–Terpstra trend tests**

| **Trend variable** | **Ferritin Day** | **JT statistic** | **p-value** |
| --- | --- | --- | --- |
| Age group | Day 1 | 1411.0 | 0.878 |
| Age group | Day 3 | 1615.5 | 0.214 |
| Age group | Day 5 | 1616.0 | 0.213 |
| Fever duration | Day 1 | 1316.0 | 0.947 |
| Fever duration | Day 3 | 1441.5 | 0.419 |
| Fever duration | Day 5 | 1433.5 | 0.452 |

**Section G — Cochran–Armitage trend tests (ferritin band vs severity)**

| **Day** | **Z statistic** | **p-value** |
| --- | --- | --- |
| Day 1 band | −8.47 | <10⁻¹⁶ |
| Day 3 band | −3.35 | <0.001 |
| Day 5 band | −7.43 | <10⁻¹³ |

**Section H — Cohen's kappa — ferritin band agreement**

| **Comparison** | **Kappa** |
| --- | --- |
| **Ferritin D1 >900 vs Severity** | 0.975 |
| **Ferritin D5 >900 vs Severity** | 0.882 |
| **Ferritin D3 >900 vs Severity** | 0.240 |
| **Weighted kappa D1 vs D3 band** | 0.145 |
| **Weighted kappa D3 vs D5 band** | 0.444 |

**Section I — Manifestation combination × severity cross-classification**

| **Bleeding** | **Shock** | **Organ Inv** | **Severity=N** | **Severity=Y** | **Total** |
| --- | --- | --- | --- | --- | --- |
| N | N | N | 37 | 3* | 40 |
| N | N | Y | 19 | 7 | 26 |
| N | Y | Y | 2 | 6 | 8 |
| Y | N | N | 4 | 0 | 4 |
| Y | N | Y | 7 | 1 | 8 |
| Y | Y | N | 1 | 1 | 2 |
| Y | Y | Y | 2 | 10 | 12 |
| Total |  |  | 72 | 28 | 100 |

** 3 severe cases with no manifestation flag — see quality-control note in Methods.*

**Table S2** Extended diagnostic accuracy analyses

**Section A — Ferritin Day 1 cut-off grid vs composite severity**

| **Cut-off ≥** | **TP** | **FP** | **FN** | **TN** | **Sensitivity** | **Specificity** |
| --- | --- | --- | --- | --- | --- | --- |
| **500 ng/ml** | 28 | 49 | 0 | 23 | 100.0% | 31.9% |
| **600 ng/ml** | 28 | 37 | 0 | 35 | 100.0% | 48.6% |
| **700 ng/ml** | 28 | 23 | 0 | 49 | 100.0% | 68.1% |
| **725 ng/ml** | 28 | 17 | 0 | 55 | 100.0% | 76.4% |
| **800 ng/ml** | 28 | 14 | 0 | 58 | 100.0% | 80.6% |
| **900 ng/ml** | 28 | 5 | 0 | 67 | 100.0% | 93.1% |
| **925 ng/ml** | 28 | 1 | 0 | 71 | 100.0% | 98.6% |
| **1,000 ng/ml** | 15 | 0 | 13 | 72 | 53.6% | 100.0% |

**Section B — Classification metrics at key cut-offs vs non-circular outcomes**

***vs Severe Thrombocytopenia <20,000/μL (n=27)***

| **Cut-off** | **Sens** | **Spec** | **LR+** | **LR−** | **DOR** | **F1** | **MCC** |
| --- | --- | --- | --- | --- | --- | --- | --- |
| **≥700** | 0.750 | 0.583 | 1.80 | 0.429 | 4.20 | 0.532 | 0.299 |
| **≥800** | 0.714 | 0.694 | 2.34 | 0.411 | 5.68 | 0.571 | 0.372 |
| **≥925** | 0.607 | 0.833 | 3.64 | 0.471 | 7.73 | 0.596 | 0.436 |
| **≥1,000** | 0.357 | 0.931 | 5.14 | 0.691 | 7.44 | 0.465 | 0.362 |

***vs Shock / DSS (n=22)***

| **Cut-off** | **Sens** | **Spec** | **LR+** | **LR−** | **DOR** | **F1** | **MCC** |
| --- | --- | --- | --- | --- | --- | --- | --- |
| **≥700** | 0.818 | 0.577 | 1.93 | 0.315 | 6.14 | 0.493 | 0.327 |
| **≥800** | 0.773 | 0.679 | 2.41 | 0.334 | 7.21 | 0.531 | 0.380 |
| **≥925** | 0.773 | 0.846 | 5.02 | 0.269 | 18.70 | 0.667 | 0.565 |
| **≥1,000** | 0.364 | 0.910 | 4.05 | 0.699 | 5.80 | 0.432 | 0.318 |

**Section C — Precision-recall AUC vs non-circular outcomes**

| **Outcome** | **Ferritin Day** | **PR-AUC** | **Prevalence baseline** |
| --- | --- | --- | --- |
| **Severe thrombocytopenia** | Day 1 | 0.526 | 0.27 |
| **Severe thrombocytopenia** | Day 3 | 0.483 | 0.27 |
| **Severe thrombocytopenia** | Day 5 | 0.510 | 0.27 |
| **Shock / DSS** | Day 1 | 0.545 | 0.22 |
| **Severe hepatitis** | Day 1 | 0.300 | 0.18 |
| **Severe bleeding** | Day 1 | 0.399 | 0.26 |

**Section D — DeLong paired AUC comparisons**

| **Comparison** | **p-value** |
| --- | --- |
| **Ferritin D1 vs D3 (vs severity)** | 0.088 |
| **Ferritin D1 vs D5 (vs severity)** | 0.110 |
| **Ferritin D3 vs D5 (vs severity)** | 0.655 |
| **Ferritin D1 vs PLT (unpaired)** | <0.001 |
| **Ferritin D1 vs AST (unpaired)** | <0.001 |
| **PLT vs AST (unpaired)** | 0.048 |

**Section E — Bootstrap AUC 95% CI (R=1,000)**

| **Analysis** | **AUC** | **Bootstrap 95% CI** |
| --- | --- | --- |
| **D1 vs Severity (circular)** | 0.997 | 0.988–1.000 |
| **D3 vs Severity (circular)** | 0.982 | 0.963–0.995 |
| **D5 vs Severity (circular)** | 0.976 | 0.946–0.996 |
| **D1 vs Severe Thrombocytopenia** | 0.727 | 0.613–0.839 |
| **D1 vs Severe Hepatitis** | 0.539 | 0.360–0.699 |
| **D1 vs Shock** | 0.789 | 0.646–0.903 |
| **D1 vs Bleeding** | 0.604 | 0.478–0.726 |

**Section F — Bootstrap Youden cut-off stability (R=1,000)**

| **Outcome** | **Median Cut-off** | **Bootstrap 95% CI** | **IQR** |
| --- | --- | --- | --- |
| **D1 vs Severity (circular)** | 925 | 925–925 | 0 (perfectly stable) |
| **D1 vs Shock** | 925 | 725–925 | 0 |
| **D1 vs Severe Thrombocytopenia** | 925 | 675–975 | 150 (variable) |

**Section G — Subgroup ROC analyses (Ferritin Day 1 vs composite severity)**

| **Subgroup** | **n** | **AUC** | **95% CI** |
| --- | --- | --- | --- |
| **Male** | 61 | 0.995 | 0.985–1.000 |
| **Female** | 39 | 1.000 | 1.000–1.000 |
| **Age ≤30 years** | 60 | 0.994 | 0.981–1.000 |
| **Age >30 years** | 40 | 1.000 | 1.000–1.000 |

**Section H — Sensitivity analysis — exclusion of 3 discrepant cases (n=97)**

| **Day** | **AUC (n=100)** | **AUC (n=97)** | **ΔAUC** |
| --- | --- | --- | --- |
| **Day 1** | 0.997 | 0.996 | −0.001 |
| **Day 3** | 0.982 | 0.980 | −0.002 |
| **Day 5** | 0.976 | 0.975 | −0.001 |

*Alternative non-circular severity (PLT<50k OR AST/ALT≥1k OR shock OR bleed): 63/100 positive; ferritin–platelet rho preserved at −0.41.*

**Section I — Ferritin velocity AUC vs non-circular outcomes**

| **Velocity Metric** | **Outcome** | **AUC** | **95% CI** |
| --- | --- | --- | --- |
| **(D3−D1)/2** | Severe thrombocytopenia | 0.571 | 0.450–0.693 |
| **(D5−D3)/2** | Severe thrombocytopenia | 0.544 | 0.426–0.662 |
| **(D5−D1)/4** | Severe thrombocytopenia | 0.557 | 0.439–0.676 |
| **(D3−D1)/2** | Shock | 0.589 | 0.463–0.715 |
| **(D3−D1)/2** | Severe hepatitis | 0.622 | 0.476–0.768 |
| **(D3−D1)/2** | Severe bleeding | 0.516 | 0.391–0.642 |

**Section J — Ferritin trapezoidal AUC and peak vs non-circular outcomes**

| **Index** | **Outcome** | **AUC** | **95% CI** |
| --- | --- | --- | --- |
| **Trapezoidal AUC (D1–D5)** | Shock | 0.791 | 0.675–0.907 |
| **Ferritin Peak** | Shock | 0.788 | 0.680–0.895 |
| **Trapezoidal AUC** | Severe thrombocytopenia | 0.726 | 0.610–0.843 |
| **Ferritin Peak** | Severe thrombocytopenia | 0.708 | 0.596–0.821 |
| **Trapezoidal AUC** | Severe hepatitis | 0.609 | 0.451–0.767 |
| **Ferritin Peak** | Severe hepatitis | 0.667 | 0.537–0.798 |
| **Trapezoidal AUC** | Severe bleeding | 0.618 | 0.486–0.749 |

**Section K — Decision curve analysis net benefit**

| **Threshold** | **PLT+Age NB** | **PLT+Age+Ferritin NB** | **Interpretation** |
| --- | --- | --- | --- |
| **0.10** | 0.20 | 0.20 | Identical |
| **0.20** | 0.10 | 0.10 | Identical |
| **0.30** | −0.029 | −0.029 | Identical |
| **0.40** | −0.200 | −0.200 | Identical |

**Section L — NRI + IDI full output**

| **Metric** | **Estimate** | **Bootstrap 95% CI** |
| --- | --- | --- |
| **NRI events component** | +0.143 | NA |
| **NRI non-events component** | 0.000 | NA |
| **NRI overall** | 0.143 | −0.167 to +0.236 |
| **IDI** | 0.000 | 0.000 to 0.000 |

**Table S3** Advanced statistical analyses

**Section A — Shapiro–Wilk normality tests (n=100)**

| **Variable** | **Shapiro W** | **p-value** | **Distribution** |
| --- | --- | --- | --- |
| **Age** | 0.893 | <0.001 | Non-normal |
| **Fever duration** | 0.929 | <0.001 | Non-normal |
| **Haemoglobin** | 0.968 | 0.016 | Non-normal |
| **TLC** | 0.800 | <0.001 | Non-normal |
| **Platelet** | 0.673 | <0.001 | Non-normal |
| **Haematocrit** | 0.982 | 0.098 | Borderline normal |
| **AST** | 0.359 | <0.001 | Non-normal |
| **ALT** | 0.436 | <0.001 | Non-normal |
| **Ferritin Day 1** | 0.945 | <0.001 | Non-normal |
| **Ferritin Day 3** | 0.881 | <0.001 | Non-normal |
| **Ferritin Day 5** | 0.912 | <0.001 | Non-normal |

**Section B — Full Spearman correlation matrix — whole cohort (n=100)**

|  | **Age** | **FvDys** | **Hb** | **TLC** | **PLT** | **HCT** | **AST** | **ALT** | **F_D1** | **F_D3** | **F_D5** |
| --- | --- | --- | --- | --- | --- | --- | --- | --- | --- | --- | --- |
| **Age** | 1.00 | 0.18 | 0.05 | 0.11 | −0.02 | −0.10 | 0.11 | 0.28 | −0.03 | 0.12 | 0.14 |
| **FvDys** |  | 1.00 | −0.08 | 0.08 | 0.05 | −0.19 | −0.09 | 0.01 | −0.02 | 0.08 | 0.01 |
| **Hb** |  |  | 1.00 | 0.09 | −0.32 | 0.30 | 0.04 | 0.02 | 0.18 | 0.30 | 0.34 |
| **TLC** |  |  |  | 1.00 | −0.36 | 0.17 | 0.28 | 0.25 | 0.02 | 0.16 | 0.10 |
| **PLT** |  |  |  |  | 1.00 | −0.08 | −0.31 | −0.20 | −0.41 | −0.40 | −0.42 |
| **HCT** |  |  |  |  |  | 1.00 | −0.08 | −0.01 | −0.09 | −0.11 | 0.04 |
| **AST** |  |  |  |  |  |  | 1.00 | 0.86 | 0.10 | 0.22 | 0.19 |
| **ALT** |  |  |  |  |  |  |  | 1.00 | 0.08 | 0.23 | 0.24 |
| **F_D1** |  |  |  |  |  |  |  |  | 1.00 | 0.65 | 0.54 |
| **F_D3** |  |  |  |  |  |  |  |  |  | 1.00 | 0.80 |
| **F_D5** |  |  |  |  |  |  |  |  |  |  | 1.00 |

*Bold = significant after BH-FDR (q<0.05); 16 pairs significant in total.*

**Section C — Spearman matrix — severe subgroup (n=28, key pairs)**

| **Variable Pair** | **rho** | **Note** |
| --- | --- | --- |
| **AST – ALT** | 0.80 | Hepatocellular coupling preserved |
| **Ferritin D1 – D3** | 0.69 | Strong autocorrelation |
| **Fever duration – Ferritin D1** | 0.52 | Absent in non-severe; severity phenotype marker |
| **Hb – PLT** | −0.48 | Haemoconcentration-thrombocytopenia dyad |
| **AST – HCT** | −0.46 | Plasma leakage vs hepatitis phenotype |
| **PLT – Ferritin D1** | −0.06 | Attenuated vs whole cohort (range restriction) |

**Section D — Spearman matrix — non-severe subgroup (n=72, key pairs)**

| **Variable Pair** | **rho** | **Note** |
| --- | --- | --- |
| **AST – ALT** | 0.87 | Stronger than whole cohort |
| **Ferritin D3 – D5** | 0.58 | Preserved autocorrelation |
| **Ferritin D1 – D3** | 0.07 | Markedly attenuated vs whole cohort |
| **TLC – PLT** | −0.42 | Preserved |
| **Fever duration – HCT** | −0.28 | Negative (opposite to severe group) |
| **PLT – Ferritin D1** | +0.03 | No ferritin–platelet signal within non-severe |

**Section E — Full FDR-corrected correlation table (all 16 significant pairs)**

| **Rank** | **Var 1** | **Var 2** | **rho** | **p-value** | **q (BH)** |
| --- | --- | --- | --- | --- | --- |
| 1 | AST | ALT | 0.856 | <10⁻¹⁶ | <10⁻¹⁶ |
| 2 | F_D3 | F_D5 | 0.798 | <10⁻¹⁶ | <10⁻¹⁶ |
| 3 | F_D1 | F_D3 | 0.649 | 2.8×10⁻¹³ | 5.2×10⁻¹² |
| 4 | F_D1 | F_D5 | 0.539 | 7.4×10⁻⁹ | 1.0×10⁻⁷ |
| 5 | PLT | F_D5 | −0.415 | 1.8×10⁻⁵ | 2.0×10⁻⁴ |
| 6 | PLT | F_D1 | −0.409 | 2.4×10⁻⁵ | 2.2×10⁻⁴ |
| 7 | PLT | F_D3 | −0.399 | 3.8×10⁻⁵ | 3.0×10⁻⁴ |
| 8 | TLC | PLT | −0.361 | 2.2×10⁻⁴ | 1.5×10⁻³ |
| 9 | Hb | F_D5 | 0.340 | 5.4×10⁻⁴ | 3.3×10⁻³ |
| 10 | Hb | PLT | −0.317 | 1.3×10⁻³ | 7.1×10⁻³ |
| 11 | PLT | AST | −0.306 | 1.9×10⁻³ | 9.6×10⁻³ |
| 12 | Hb | F_D3 | 0.304 | 2.1×10⁻³ | 9.6×10⁻³ |
| 13 | Hb | HCT | 0.301 | 2.4×10⁻³ | 1.0×10⁻² |
| 14 | Age | ALT | 0.280 | 4.8×10⁻³ | 1.9×10⁻² |
| 15 | TLC | AST | 0.276 | 5.4×10⁻³ | 2.0×10⁻² |
| 16 | TLC | ALT | 0.252 | 1.2×10⁻² | 4.0×10⁻² |

**Section F — LMM estimated marginal means and velocity**

| **Day** | **Severity** | **EM Mean (ng/ml)** | **SE** | **95% CI** |
| --- | --- | --- | --- | --- |
| **Day 1** | Non-severe | 578.2 | 17.2 | 544.2–612.1 |
| **Day 3** | Non-severe | 881.9 | 17.2 | 848.0–915.9 |
| **Day 5** | Non-severe | 706.9 | 17.2 | 673.0–740.9 |
| **Day 1** | Severe | 996.4 | 27.6 | 942.0–1,050.9 |
| **Day 3** | Severe | 1,142.9 | 27.6 | 1,088.4–1,197.3 |
| **Day 5** | Severe | 975.0 | 27.6 | 920.6–1,029.4 |

| **Severity** | **Rise velocity D1→D3 (ng/ml/day)** | **Decline velocity D3→D5 (ng/ml/day)** |
| --- | --- | --- |
| **Non-severe** | +151.9 ± 105.9 | −87.5 ± 62.2 |
| **Severe** | +73.2 ± 35.3 | −83.9 ± 38.0 |

**Section G — Bootstrap Cohen's d for severity comparison (R=1,000)**

| **Variable** | **d** | **Bootstrap 95% CI** |
| --- | --- | --- |
| **Haemoglobin** | +0.98 | 0.54–1.45 |
| **Platelet** | −0.88 | −1.58 to −0.63 |
| **ALT** | +0.54 | 0.03–1.08 |
| **HCT** | −0.22 | −0.63 to +0.24 |
| **AST** | +0.17 | −0.18 to +0.82 |
| **Age** | +0.09 | −0.33 to +0.52 |
| **TLC** | −0.05 | −0.36 to +0.34 |
| **Fever duration** | −0.01 | −0.42 to +0.46 |

**Section H — Univariate logistic regression (outcome: WHO 2009 severity)**

| **Predictor** | **OR** | **95% CI** | **p-value** |
| --- | --- | --- | --- |
| **Age** | 1.01 | 0.97–1.04 | 0.728 |
| **Sex (Male)** | 1.51 | 0.61–3.92 | 0.382 |
| **Fever duration** | 0.99 | 0.80–1.20 | 0.936 |
| **Haemoglobin** | 1.50 | 1.22–1.92 | <0.001 |
| **TLC** | 0.99 | 0.89–1.08 | 0.779 |
| **Platelet (per unit)** | 1.00 | 1.00–1.00 | <0.001 |
| **Haematocrit** | 0.97 | 0.91–1.03 | 0.366 |
| **AST** | 1.000 | 1.00–1.00 | 0.631 |
| **ALT** | 1.001 | 1.000–1.001 | 0.032 |
| **Ferritin D1†** | — | ∞ (quasi-separation) | 0.996 |
| **Ferritin D3** | 1.04 | 1.03–1.08 | <0.001 |
| **Ferritin D5** | 1.07 | 1.04–1.13 | 0.002 |

*† Quasi-complete separation at 950 ng/ml — CI undefined; numerical evidence of circularity.*

**Section I — Trajectory clustering (k-means k=3 and GMM)**

***k-means (k=3)***

| **Cluster** | **n** | **Non-severe** | **Severe** | **Characterisation** |
| --- | --- | --- | --- | --- |
| **1** | 29 | 1 | 28 | High ferritin; severe phenotype (χ²=95.21, p<0.001) |
| **2** | 54 | 54 | 0 | Typical rise–fall non-severe |
| **3** | 17 | 17 | 0 | Blunted kinetics non-severe |

*Silhouette scores: k=2: 0.49; k=3: 0.48; k=4: 0.46; k=5: 0.48*

***GMM (4-cluster VEV, BIC-selected)***

| **Cluster** | **n** | **Non-severe** | **Severe** | **Characterisation** |
| --- | --- | --- | --- | --- |
| **1** | 32 | 32 | 0 | Non-severe low ferritin |
| **2** | 13 | 2 | 11 | Moderate-ferritin severe sub-phenotype |
| **3** | 38 | 38 | 0 | Non-severe moderate |
| **4** | 17 | 0 | 17 | High-ferritin severe sub-phenotype |

**Section J — Hierarchical clustering (Ward's linkage)**

| **k** | **Cluster sizes** | **Composition (NS|Sev)** | **Cophenetic r** |
| --- | --- | --- | --- |
| 2 | 72, 28 | 72|0 and 0|28 | 0.651 |
| 3 | 52, 20, 28 | 52|0; 20|0; 0|28 | 0.651 |
| 4 | 21, 20, 28, 31 | 21|0; 20|0; 0|28; 31|0 | 0.651 |

*Perfect severity separation at k=2; subsequent splits subdivide non-severe only.*

**Section K — PCA eigenvalues, loadings and severity separation**

***Eigenvalues***

| **Component** | **Eigenvalue** | **% Variance** | **Cumulative %** |
| --- | --- | --- | --- |
| **PC1** | 2.704 | 30.05 | 30.05 |
| **PC2** | 1.844 | 20.49 | 50.54 |
| **PC3** | 1.344 | 14.93 | 65.47 |
| **PC4** | 0.860 | 9.55 | 75.03 |
| **PC5** | 0.760 | 8.45 | 83.47 |

***Component loadings (PC1–PC3)***

| **Variable** | **PC1** | **PC2** | **PC3** | **Interpretation** |
| --- | --- | --- | --- | --- |
| **Ferritin D1** | +0.683 | −0.306 | −0.278 |  |
| **Ferritin D3** | +0.870 | −0.168 | −0.272 | PC1 = Ferritin–thrombocytopenia axis |
| **Ferritin D5** | +0.816 | −0.314 | −0.094 |  |
| **Platelet** | −0.460 | −0.053 | −0.471 |  |
| **AST** | +0.279 | +0.866 | −0.055 | PC2 = Hepatitis axis |
| **ALT** | +0.467 | +0.758 | −0.152 |  |
| **Hb** | +0.503 | −0.188 | +0.439 |  |
| **HCT** | +0.114 | −0.112 | +0.808 | PC3 = Haematocrit axis |
| **TLC** | +0.199 | +0.498 | +0.302 |  |

*Mann–Whitney on PC scores by severity: PC1: W=26, p<0.001; PC2: W=1,451, p=0.0007.*
